# Supplementary material for: The effects of genetic and modifiable risk factors on brain regions vulnerable to ageing and disease
Source: PubMed Central journal article supplement (PMC10973379; doi:10.1038/s41467-024-46344-2), 2024-03-27
Supplement: 41467_2024_46344_MOESM5_ESM.pdf [file 41467_2024_46344_MOESM5_ESM.pdf]

## Reporting Summary

Nature Portfolio wishes to improve the reproducibility of the work that we publish. This form provides structure for consistency and transparency in reporting. For further information on Nature Portfolio policies, see our [Editorial Policies](#) and the [Editorial Policy Checklist](#).

### Statistics

For all statistical analyses, confirm that the following items are present in the figure legend, table legend, main text, or Methods section.

n/a | Confirmed

- The exact sample size ( $n$ ) for each experimental group/condition, given as a discrete number and unit of measurement
- A statement on whether measurements were taken from distinct samples or whether the same sample was measured repeatedly
- The statistical test(s) used AND whether they are one- or two-sided  
*Only common tests should be described solely by name; describe more complex techniques in the Methods section.*
- A description of all covariates tested
- A description of any assumptions or corrections, such as tests of normality and adjustment for multiple comparisons
- A full description of the statistical parameters including central tendency (e.g. means) or other basic estimates (e.g. regression coefficient) AND variation (e.g. standard deviation) or associated estimates of uncertainty (e.g. confidence intervals)
- For null hypothesis testing, the test statistic (e.g.  $F$ ,  $t$ ,  $r$ ) with confidence intervals, effect sizes, degrees of freedom and  $P$  value noted  
*Give  $P$  values as exact values whenever suitable.*
- For Bayesian analysis, information on the choice of priors and Markov chain Monte Carlo settings
- For hierarchical and complex designs, identification of the appropriate level for tests and full reporting of outcomes
- Estimates of effect sizes (e.g. Cohen's  $d$ , Pearson's  $r$ ), indicating how they were calculated

*Our web collection on [statistics for biologists](#) contains articles on many of the points above.*

### Software and code

Policy information about [availability of computer code](#)

Data collection

Data analysis

For manuscripts utilizing custom algorithms or software that are central to the research but not yet described in published literature, software must be made available to editors and reviewers. We strongly encourage code deposition in a community repository (e.g. GitHub). See the Nature Portfolio [guidelines for submitting code & software](#) for further information.

### Data

Policy information about [availability of data](#)

All manuscripts must include a [data availability statement](#). This statement should provide the following information, where applicable:

- Accession codes, unique identifiers, or web links for publicly available datasets
- A description of any restrictions on data availability
- For clinical datasets or third party data, please ensure that the statement adheres to our [policy](#)

All source data is available (upon data access application) from UK Biobank, and using VBM GM maps previously generated and made available in full: [https://www.fmrib.ox.ac.uk/datasets/FLICA\\_ThickAreaVol/](https://www.fmrib.ox.ac.uk/datasets/FLICA_ThickAreaVol/).

All the FLICA decomposition maps - including the LIFO grey matter network - in UK Biobank standard space, the UK Biobank grey matter template, scripts, and the

LIFO loadings for all of the participants are freely available on a dedicated webpage: [open.win.ox.ac.uk/pages/douaud/ukb-lifo-flica/](https://open.win.ox.ac.uk/pages/douaud/ukb-lifo-flica/).

## Research involving human participants, their data, or biological material

Policy information about studies with [human participants or human data](#). See also policy information about [sex, gender \(identity/presentation\), and sexual orientation](#) and [race, ethnicity and racism](#).

|                                                                    |                                                                                                                                                                                                                                                                                                                                                                                                                                                                                 |
|--------------------------------------------------------------------|---------------------------------------------------------------------------------------------------------------------------------------------------------------------------------------------------------------------------------------------------------------------------------------------------------------------------------------------------------------------------------------------------------------------------------------------------------------------------------|
| Reporting on sex and gender                                        | We have made sure to use the term sex throughout, and have added this information in the Methods: "Sex was based on the population characteristics entry of UK Biobank. This is a mixture of the sex the NHS had recorded for the participant at recruitment, and updated self-reported sex. For the GWAS, both sex and genetic sex were used (the sample was excluded in case of a mismatch). "<br>Sex has been used as a confounder (sex, age × sex, age <sup>2</sup> × sex). |
| Reporting on race, ethnicity, or other socially relevant groupings | We examined SES via the Townsend Deprivation Index, but it had little bearing on the results, and thus was not considered as a confounding factor.<br>White/non-White ethnicity in UK Biobank is comparable with the UK general population.                                                                                                                                                                                                                                     |
| Population characteristics                                         | Age: 44-82 years, mean 64 ± 7 years<br>(M/F 47%-53%)                                                                                                                                                                                                                                                                                                                                                                                                                            |
| Recruitment                                                        | Participants recruited by UK Biobank: the participants in this prospective imaging study are healthier than the UK Biobank at large, which is itself healthier, less deprived, and better educated than the UK general population.                                                                                                                                                                                                                                              |
| Ethics oversight                                                   | Human subjects: UK Biobank has approval from the North West Multi-centre Research Ethics Committee (MREC) to obtain and disseminate data and samples from the participants ( <a href="http://www.ukbiobank.ac.uk/ethics/">http://www.ukbiobank.ac.uk/ethics/</a> ), and these ethical regulations cover the work in this study. Written informed consent was obtained from all participants. A statement on this is included in the paper.                                      |

Note that full information on the approval of the study protocol must also be provided in the manuscript.

## Field-specific reporting

Please select the one below that is the best fit for your research. If you are not sure, read the appropriate sections before making your selection.

Life sciences  Behavioural & social sciences  Ecological, evolutionary & environmental sciences

For a reference copy of the document with all sections, see [nature.com/documents/nr-reporting-summary-flat.pdf](https://nature.com/documents/nr-reporting-summary-flat.pdf)

## Life sciences study design

All studies must disclose on these points even when the disclosure is negative.

|                 |                                                                                                                                                                                                                                                                                                                                                                                                                                                                                                                                                                                                                                                                                                                                                                                            |
|-----------------|--------------------------------------------------------------------------------------------------------------------------------------------------------------------------------------------------------------------------------------------------------------------------------------------------------------------------------------------------------------------------------------------------------------------------------------------------------------------------------------------------------------------------------------------------------------------------------------------------------------------------------------------------------------------------------------------------------------------------------------------------------------------------------------------|
| Sample size     | Sample size was determined by data availability from UK Biobank. Exact samples sizes are listed in Methods and in Tables.                                                                                                                                                                                                                                                                                                                                                                                                                                                                                                                                                                                                                                                                  |
| Data exclusions | For the genetic analyses, we applied filters to remove variants with minor allele frequency (MAF) below 0.1% and with an imputation information score below 0.3. We then kept only those participants estimated to have recent British ancestry using the sample quality control information provided centrally by UK Biobank (using the variable in.white.British.ancestry.subset in the file ukb_sqc_v2.txt); population structure can be a serious confound to genetic association studies, and this type of sample filtering is standard. The UK Biobank dataset also contains a number of close relatives (3rd cousin or closer). We therefore created a subset of nominally unrelated subjects. This follows similar procedures in our previous papers, e.g., Elliott et al. (2018). |
| Replication     | For the genome-wide association study: we randomly split the samples into a discovery set with 2/3 of the samples (n = 22,128) and a replication set with 1/3 of the samples (n = 11,083). See Methods.                                                                                                                                                                                                                                                                                                                                                                                                                                                                                                                                                                                    |
| Randomization   | N/A                                                                                                                                                                                                                                                                                                                                                                                                                                                                                                                                                                                                                                                                                                                                                                                        |
| Blinding        | N/A                                                                                                                                                                                                                                                                                                                                                                                                                                                                                                                                                                                                                                                                                                                                                                                        |

## Reporting for specific materials, systems and methods

We require information from authors about some types of materials, experimental systems and methods used in many studies. Here, indicate whether each material, system or method listed is relevant to your study. If you are not sure if a list item applies to your research, read the appropriate section before selecting a response.

## Materials &amp; experimental systems

- n/a Involved in the study
- Antibodies
- Eukaryotic cell lines
- Palaeontology and archaeology
- Animals and other organisms
- Clinical data
- Dual use research of concern
- Plants

## Methods

- n/a Involved in the study
- ChIP-seq
- Flow cytometry
- MRI-based neuroimaging

## Clinical data

Policy information about [clinical studies](#)

All manuscripts should comply with the ICMJE [guidelines for publication of clinical research](#) and a completed [CONSORT checklist](#) must be included with all submissions.

- Clinical trial registration
- Study protocol
- Data collection
- Outcomes

## Plants

- Seed stocks
- Novel plant genotypes
- Authentication

## Magnetic resonance imaging

## Experimental design

- Design type
- Design specifications
- Behavioral performance measures

## Acquisition

- Imaging type(s)
- Field strength
- Sequence & imaging parameters
- Area of acquisition
- Diffusion MRI  Used  Not used

## Preprocessing

- Preprocessing software

|                            |                                                                                                                                                                  |
|----------------------------|------------------------------------------------------------------------------------------------------------------------------------------------------------------|
| Normalization              | Non-linear registration was used based on the structural images (please see Miller et al., Nature Neuroscience 2016, and Alfaro-Almagro et al., Neuroimage 2018) |
| Normalization template     | UK Biobank GM template based on 15K participants (provided).                                                                                                     |
| Noise and artifact removal | Please see Alfaro-Almagro et al., Neuroimage 2018                                                                                                                |
| Volume censoring           | N/A                                                                                                                                                              |

## Statistical modeling & inference

|                                           |                                                                                                                                                                                                                                                                                                    |
|-------------------------------------------|----------------------------------------------------------------------------------------------------------------------------------------------------------------------------------------------------------------------------------------------------------------------------------------------------|
| Model type and settings                   | Regression/correlation (see Methods for full details).                                                                                                                                                                                                                                             |
| Effect(s) tested                          | Effects of modifiable risk factors (with and without age/sex/head size confounders), individually and in a unique model on the brain regions of interest.<br>Effects of genetic variants on the brain regions of interest.                                                                         |
| Specify type of analysis:                 | <input type="checkbox"/> Whole brain <input type="checkbox"/> ROI-based <input checked="" type="checkbox"/> Both                                                                                                                                                                                   |
| Anatomical location(s)                    | Based on the linear decomposition of grey matter structural variance using linked-ICA                                                                                                                                                                                                              |
| Statistic type for inference              | N/A                                                                                                                                                                                                                                                                                                |
| (See <a href="#">Eklund et al. 2016</a> ) |                                                                                                                                                                                                                                                                                                    |
| Correction                                | Bonferroni (genetics analyses: across genome, across non-imaging phenotypes; modifiable risk factors: across risk factors for individual analyses, across all combinations of every possible risk factor from each of the initial 15 risk factor categories for the combined study [unique model]) |

## Models & analysis

|                                     |                                                                       |
|-------------------------------------|-----------------------------------------------------------------------|
| n/a                                 | Involvement in the study                                              |
| <input checked="" type="checkbox"/> | <input type="checkbox"/> Functional and/or effective connectivity     |
| <input checked="" type="checkbox"/> | <input type="checkbox"/> Graph analysis                               |
| <input checked="" type="checkbox"/> | <input type="checkbox"/> Multivariate modeling or predictive analysis |
